# Supplementary material for: Transcriptome-wide Variability in Single Embryonic Development Cells
Source: PubMed Central journal article supplement (PMC4238013; doi:10.1038/srep07137), 2014-11-20
Supplement: srep07137-s1.pdf [file srep07137-s1.pdf]

# Transcriptome-wide Variability in Single Embryonic Development Cells

Vincent Piras, Masaru Tomita and Kumar Selvarajoo\*

## Supplementary Information

**Figure S1. Pearson correlations of single cell transcriptomes.** Pearson correlations,  $R$ , of single cell transcriptomes at same (diagonal) and different developmental stages.

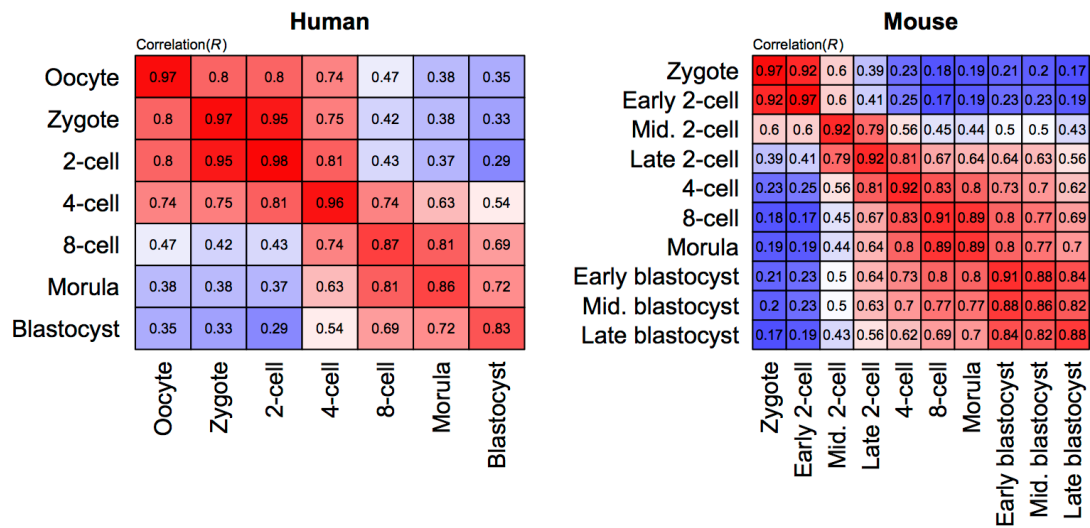

**Figure S2. Non-linear correlations of single cell transcriptomes for human and mouse development stages.** Spearman correlation,  $\rho$  (A), Distance Correlation,  $dCor$  (B), and Maximum Information Coefficient,  $MIC$  (C) between transcriptomes of cells of the same development stage (dotted lines) and or between transcriptomes of zygote and other stages (solid lines) for human and mouse.

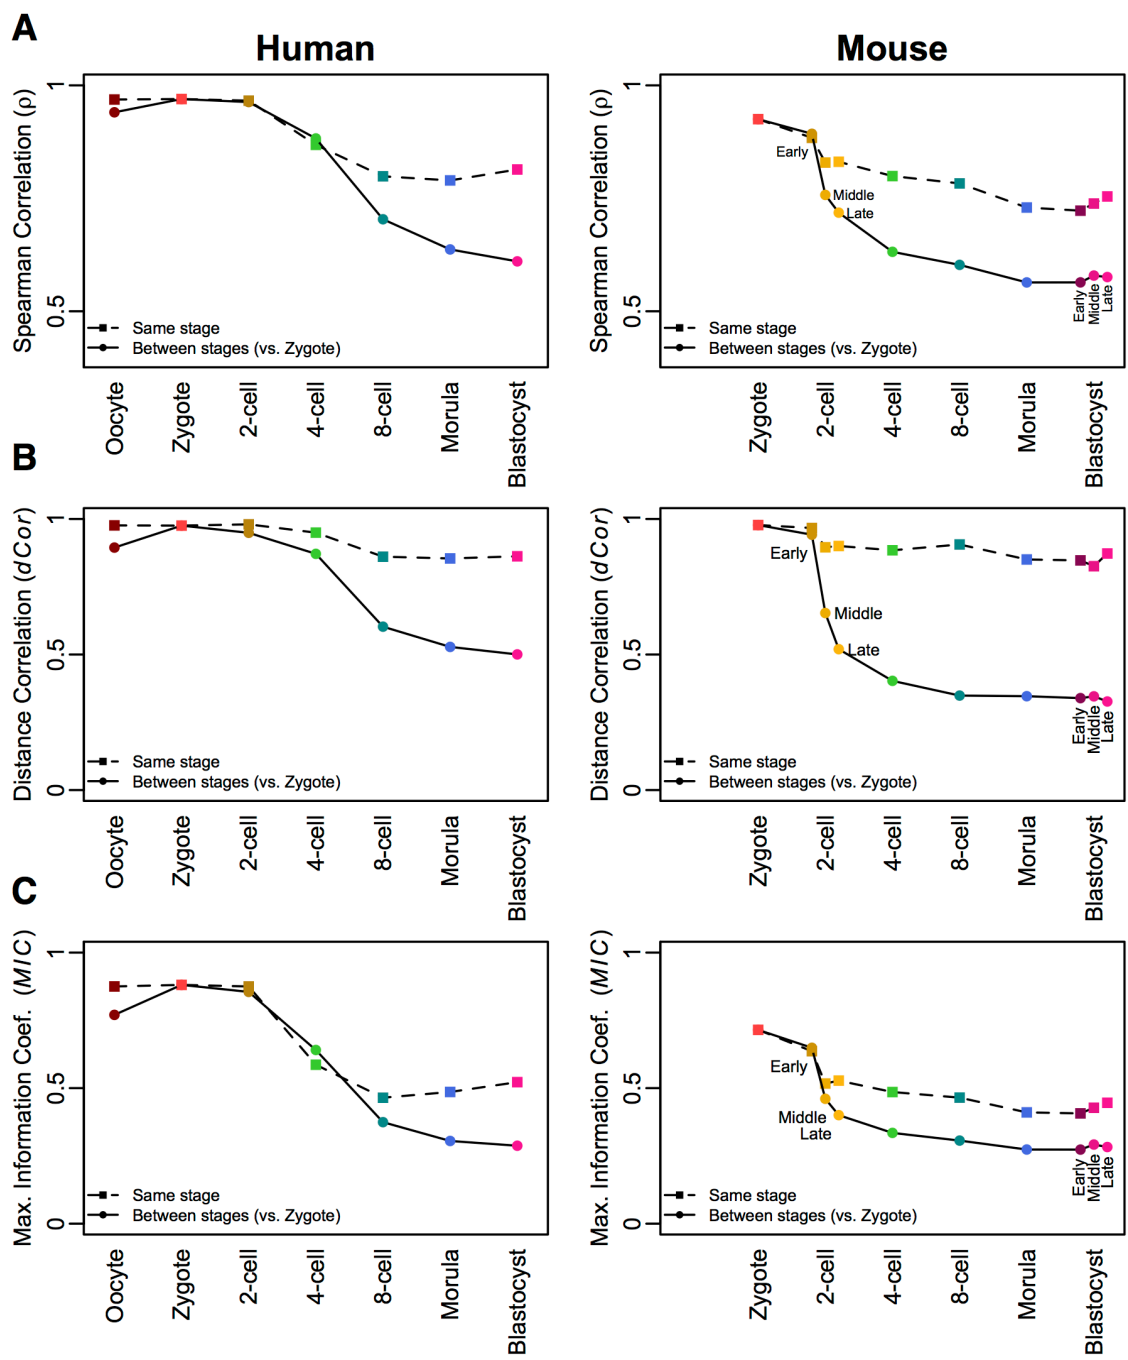

**Figure S3. Total transcriptome noise in single somatic, cancer and ES cells. (A)** Average total transcriptome noise ( $\eta_{tot}^2$ ) of single ES, somatic (normal melanocyte), and cancer (circulating melanoma, SKMEL5 and UACC257 melanoma, LNCaP and PC3 prostate cancer, T24 bladder cancer) cells stage (average for  $m$  cells, error bars indicate 1 s.d.). Data was obtained from GEO dataset GSE38495 (Ramsköld et al., *Nat. Biotechnol.* **30**, 777–782 (2012)), and contains expressions (RPKM values) of  $n = 21517$  genes. **(B)** Noise ( $\eta^2$ ) vs. mean ( $\mu$ ) expression patterns for each cell type.

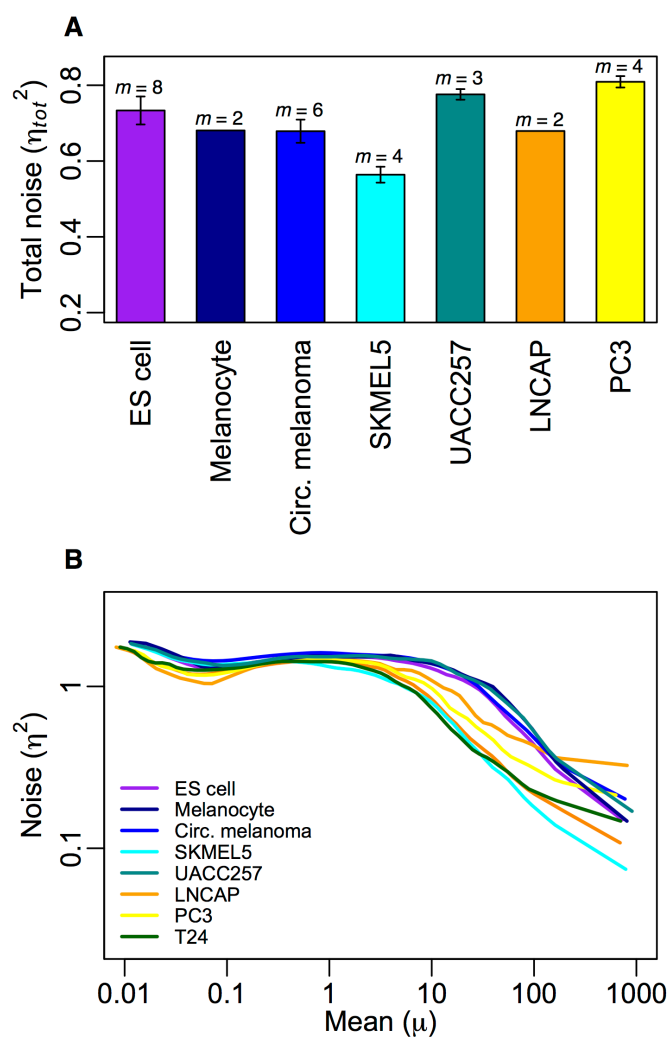

**Figure S4. Fitting of the transcriptome-wide noise patterns.** Noise ( $\eta^2$ ) vs. mean ( $\mu$ ) expression patterns follow the relationship  $\eta^2(\mu) = \alpha/\mu + \beta$  for each human (A) and mouse (B) development stage. Values of  $\alpha$  and  $\beta$  were determined by non-linear squares fitting.

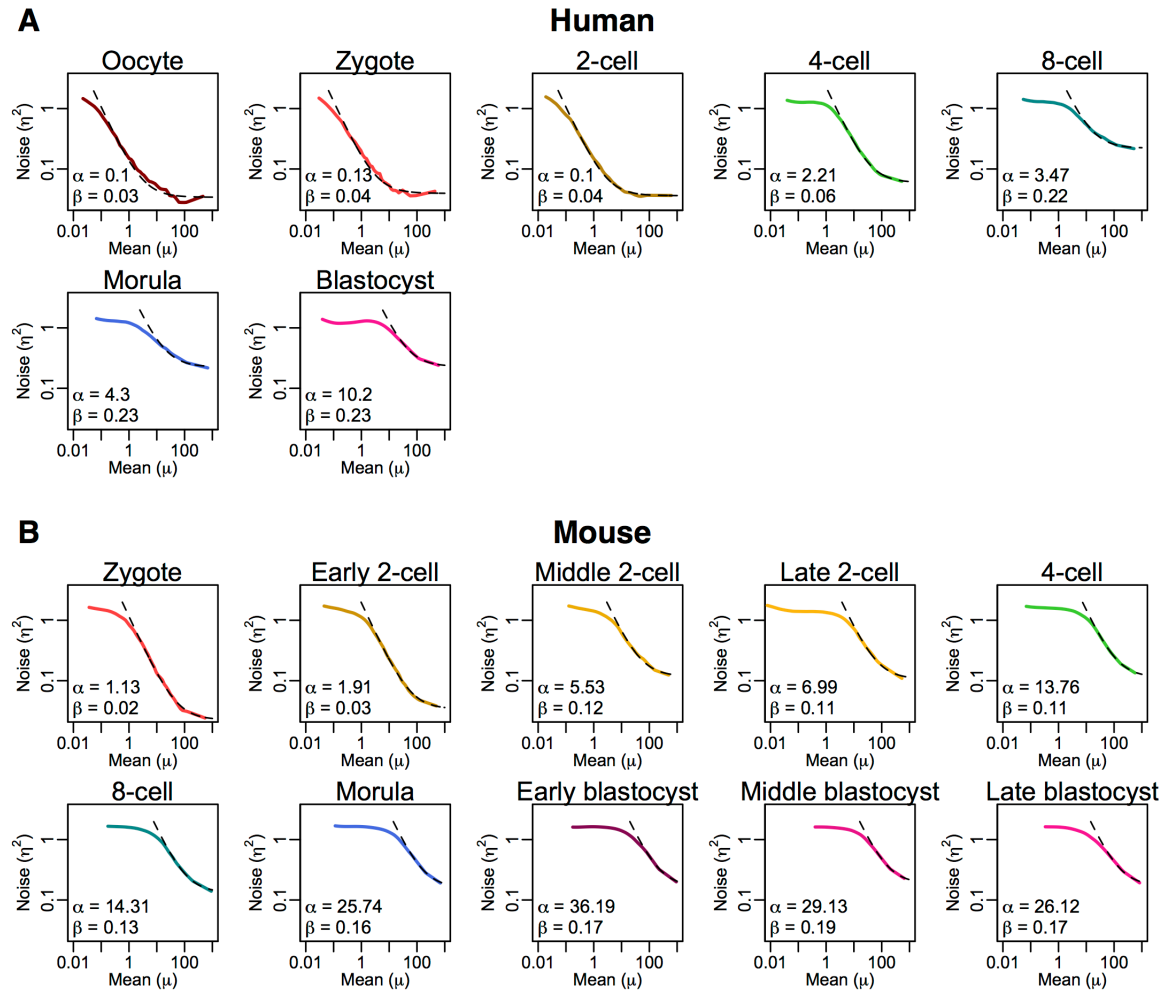

**Figure S5. Transcriptome-wide noise patterns for each development stage when varying grouping size.** Transcriptome-wide noise patterns were obtained by sorting the transcriptome into groups of  $w = 50, 100, 500$  or  $1000$  genes from low to high expressions, averaging the mean expression ( $\mu$ ) and noise ( $\eta^2$ ) of all genes in each group for all pair of cells. We chose  $w = 500$  for analysis in the maintext.

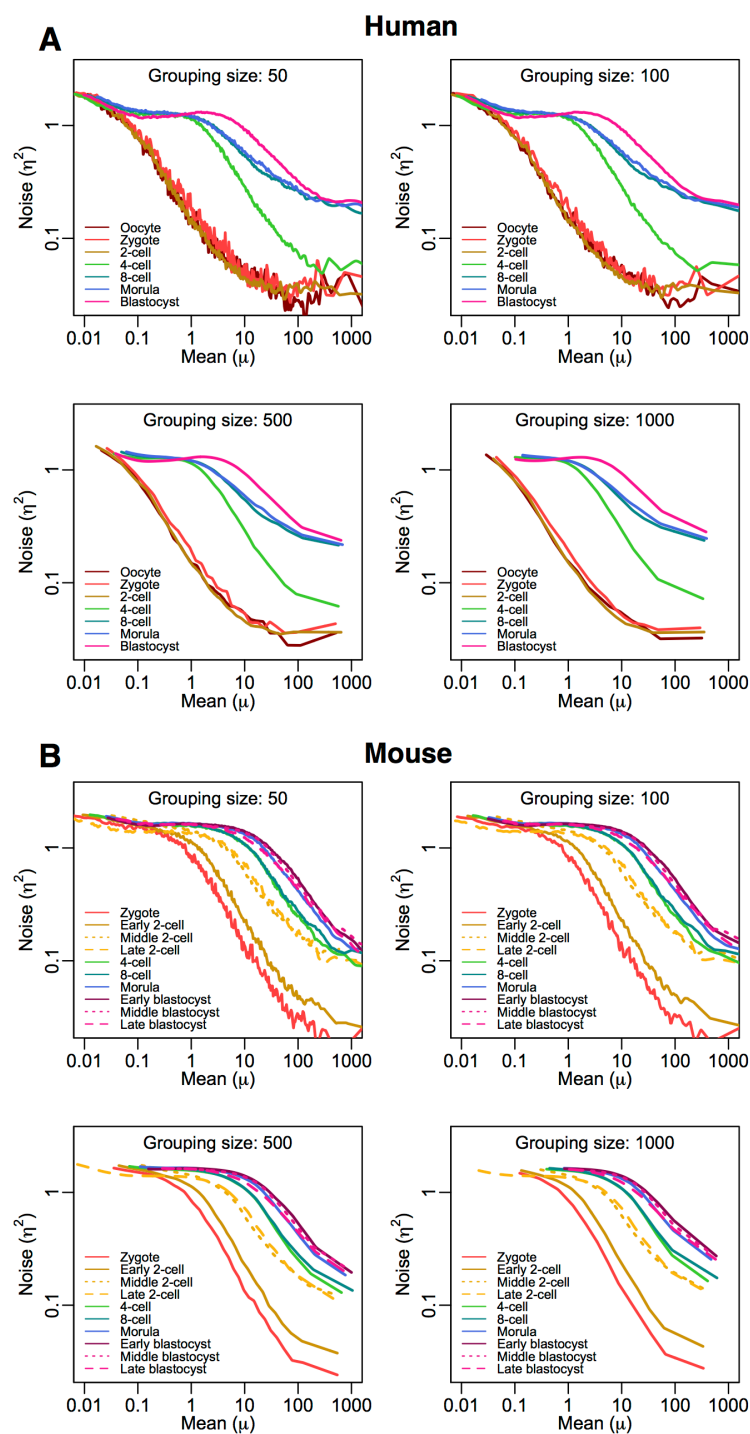

**Figure S6. Distributions of RNA degradation and transcription rates constants.** (A) The distribution of degradation rates constants,  $\delta_i$  was obtained from differentiating mouse ES cells data (Sharova et al., *DNA Res.* **16**, 45–58 (2009)) and human B cells (Friedel et al., *Nucleic Acids Res.* **37**, e115 (2009)) and fitted to a lognormal distribution with mean (log scale) and standard deviation parameters,  $\mu = -2.24$  and  $\sigma = 0.61$  for mouse, and  $\mu = -1.58$  and  $\sigma = 0.73$  for human. (B) The time-averaged RNA transcription rates,  $T_i$ , were estimated from the same data, such as  $T_i = x_i \delta_i$ , where  $x_i$  is the steady state expression value of the  $i^{\text{th}}$  gene, such as  $\Pr(X = x_i) = x^{-0.8} / \sum_{k=1}^{20000} k^{-0.8}$ . (Zipf's law with exponent  $r = 0.8$ , for a population of  $n = 20,000$  genes. Exponent was estimated from the experimental data, see insert for a representative dataset (mouse and human blastocysts)). As a result, we fitted the estimated values of  $T_i$  to a lognormal distribution with parameters  $\mu = 0.17$  and  $\sigma = 2.67$  for mouse, and  $\mu = 0.73$  and  $\sigma = 2.53$  for human. To generate a random value for  $s_i$ , we first generate a value for  $T_i$  from the above lognormal distribution, and compute  $s_i$ , such as  $s_i = T_i (k_{on,i} + k_{off,i}) / (\phi_i k_{on,i})$ , knowing  $\phi_i$ ,  $k_{on,i}$  and  $k_{off,i}$  beforehand.

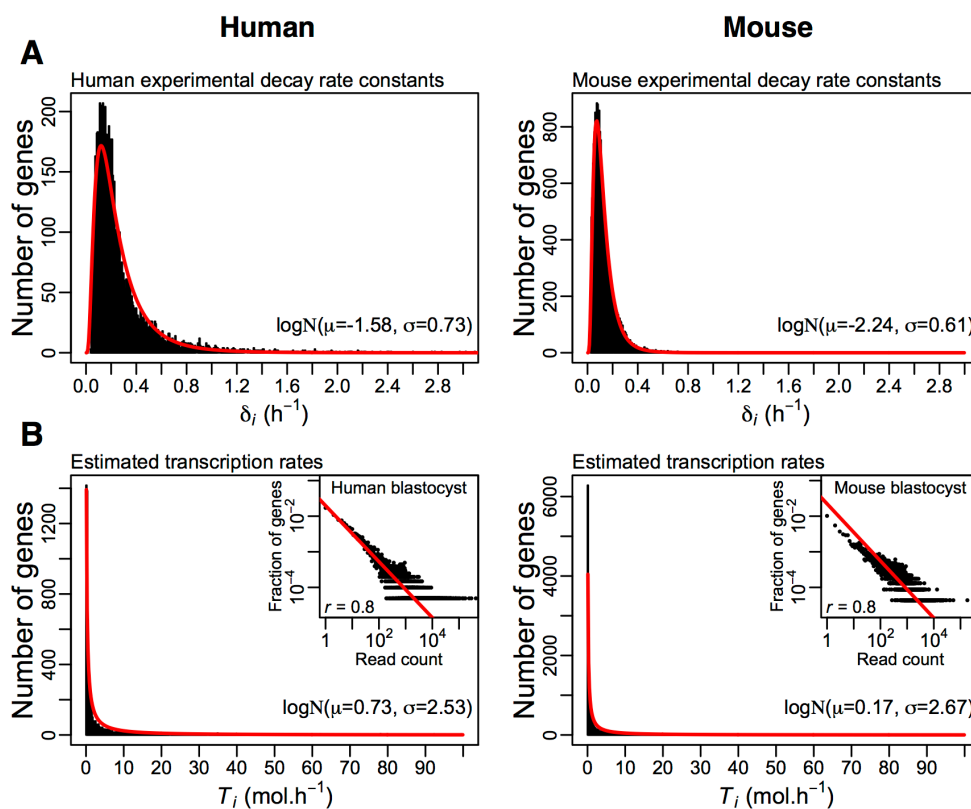

**Figure S7. Simulated gene expression density distributions for each human and mouse development stage.** Distributions were estimated using kernel density estimation (*kde2d* R function) of all genes expressions in the  $j^{\text{th}}$  and  $k^{\text{th}}$  cell simulated transcriptomes for all pairs of single cells. See Figure 4C (maintext) for the parameters of the simulations. Blue and red colors indicate high density regions

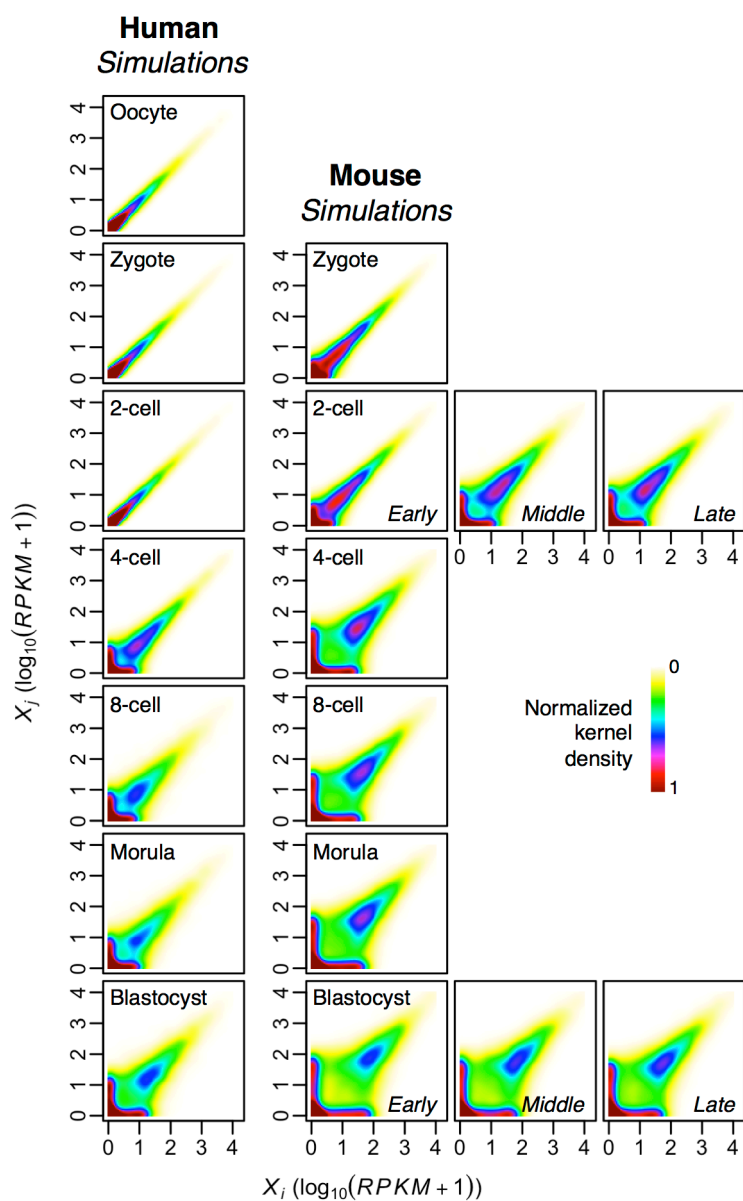

**Figure S8. Fitting simulations to mouse experimental patterns.** Panel 1: simulations (black curves) using continuous activation, no amplification and no extrinsic noise. Panel 2: adding extrinsic noise increases  $\beta$ . Panel 3: low transcriptional amplification increases  $\alpha$ . This pattern fits early development stages (e.g. zygote, brown curve). Panel 4: higher amplification further increases  $\alpha$ . Panel 5: switching from continuous to quantal activation further increases  $\beta$ . This pattern fits later development stages (e.g. early blastocyst, purple curve).

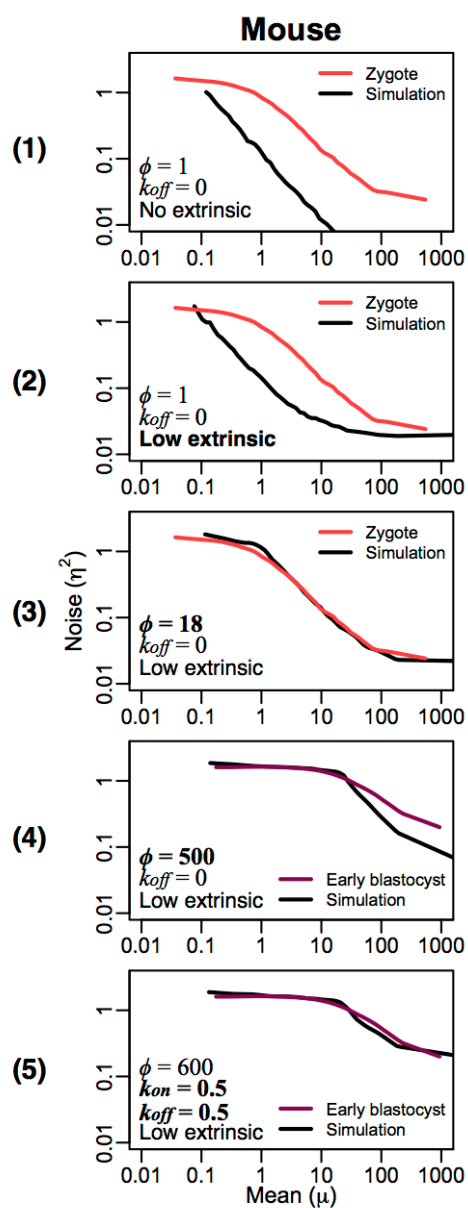



**Figure S9. Gene expression profiles of maternal and zygotic genes during development.**

Individual expression profiles of **(A)** maternal (2 clusters) and **(B)** zygotic (3 clusters) genes during human embryo development. Average expression profiles of each cluster are shown in bold lines. Clusters were obtained using k-means clustering. From the initial lists of genes obtained from Xue et al., *Nature* **500**, 593–597 (2013) (see Table S1), we retained maternal genes with expression values reaching maximum before 4-cell stages and zygotic genes with expression values reaching maximum from 8-cell stage onwards.

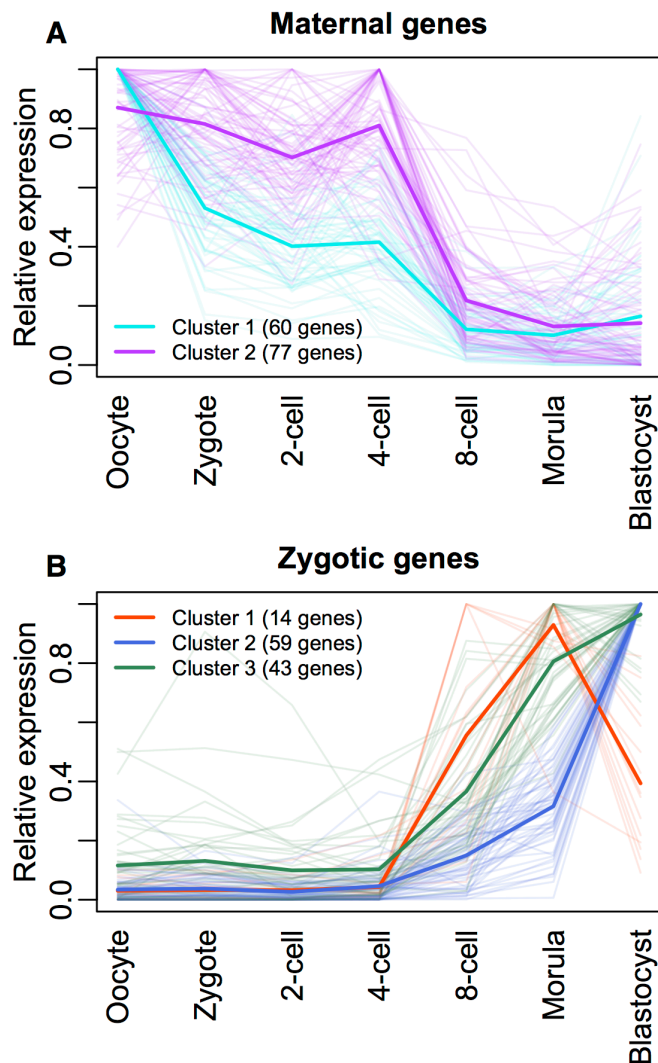

**Table S1. List of genes activated at early stages (maternal) or late stages (zygotic)**

| Maternal genes (oocyte/zygote) |         |                          | Zygotic genes (morula)  |         |                             |
|--------------------------------|---------|--------------------------|-------------------------|---------|-----------------------------|
| Abca5                          | Grtp1   | Skp1                     | Adck1                   | Klf8    | Tmem33                      |
| Abcc4                          | H1foo   | Skp2                     | Agl                     | Lama1   | Tspan6                      |
| Abi3bp                         | Hook2   | Snx25                    | Aimp1                   | Ldha    | Tubb4                       |
| Acvr1b                         | Igsf11  | Sp2                      | Akap2                   | Ldhb    | Txn                         |
| Akd1                           | Ints9   | Spire1                   | Arpc3                   | Lrpprc  | Txndc12                     |
| Ampd3                          | Itgae   | Stard7                   | Atp1b3                  | Lsm3    | Uqcrb                       |
| Ankra2                         | Kif15   | Stk38                    | Atp5f1                  | Lsm5    | Uqcrh                       |
| Arhgef16                       | Kif11   | Tapt1                    | Bcat1                   | Lypla1  | Usmg5                       |
| Arv1                           | Klhdc3  | Tdrd6                    | Btf3L4                  | Mbnl3   | Wee1                        |
| Asf1b                          | Lamb1   | Tfg                      | C14orf147               | Mreg    | Yipf4                       |
| Bcl2l10                        | Lancl1  | Thoc7                    | C1orf109                | Mrpl1   | Zbtb8os                     |
| Bicap                          | Lmo3    | Tifa                     | C2orf74                 | Mrpl27  |                             |
| Bnip1                          | Lonrf1  | Tmcc1                    | C4orf3                  | Mrps17  | <i>Myc<sup>b</sup></i>      |
| C16orf57                       | Lrch1   | Tmem163                  | C6orf211                | Mrs2    | <i>Sox2<sup>b,c</sup></i>   |
| C1orf210                       | Lrmp    | Tnfsf13                  | C8orf59                 | Mtfmt   | <i>Pou5f1<sup>b,c</sup></i> |
| C1orf226                       | Lrrc16a | Trafd1                   | Cachd1                  | Mtif2   | <i>Nanog<sup>c</sup></i>    |
| C22orf13                       | Lrrc49  | Trak1                    | Cbx3                    | Ndc80   | <i>Lin28a<sup>c</sup></i>   |
| C2orf29                        | Mal2    | Troap                    | Ccdc72                  | Ndufb3  |                             |
| C4orf27                        | Mctp2   | Tspan7                   | Cct5                    | Olr1    |                             |
| C5orf22                        | Meaf6   | Tubg1                    | Cct6z                   | Pdcl2   |                             |
| C5orf34                        | Mettl9  | Tubg2                    | Cflar                   | Pet117  |                             |
| C7orf10                        | Mfap3l  | Ube2u                    | Chchd4                  | Pin4    |                             |
| Casc3                          | Mknk1   | Unkl                     | Cnih4                   | Ppap2a  |                             |
| Cenpe                          | Mobkl1b | Wasf3                    | Cox7b2                  | Ppp2r5a |                             |
| Cep78                          | Mobkl3  | Wdr69                    | Cpne3                   | Prim1   |                             |
| Chic1                          | Mterfd1 | Ypel1                    | Cpox                    | Prom1   |                             |
| Ciapin1                        | Nars2   | Zc3h7a                   | Csrp2Bp                 | Psma1   |                             |
| Clec10a                        | Necap2  | Zc3h8                    | Dapk1                   | Psmc6   |                             |
| Clstn2                         | Nid2    | Zfyve21                  | Denr                    | Ptplad1 |                             |
| Cnn3                           | Nup133  | Znf407                   | Dnajc25                 | Pum1    |                             |
| Creb1                          | Nup37   | Zswim3                   | Dsp                     | Rel1    |                             |
| Dclk2                          | Pan2    |                          | Egflam                  | Rg9mtd2 |                             |
| Dclre1a                        | Papd4   | <i>Cdh3<sup>a</sup></i>  | Eif2s2                  | Rpl11   |                             |
| Depdc7                         | Papd7   | <i>Dppa5<sup>a</sup></i> | F2r                     | Rpl17   |                             |
| Dhx32                          | Papss1  | <i>Mos<sup>a</sup></i>   | Fa2h                    | Rpl21   |                             |
| Dmrtb1                         | Pcmt1   | <i>Npm2<sup>a</sup></i>  | Fam108c1                | Rpl22   |                             |
| Dnajc3                         | Per3    | <i>Zp1<sup>a</sup></i>   | Fbxo22                  | Rpl23   |                             |
| Dpf2                           | Polb    | <i>Zp2<sup>a</sup></i>   | Gde1                    | Rpl34   |                             |
| Dusp19                         | Ppil2   |                          | Gdpd1                   | Rpl39L  |                             |
| Dusp7                          | Ptprk   |                          | Gja1                    | Rpl7    |                             |
| Dync2h1                        | Rai14   |                          | Glud1                   | Rps27a  |                             |
| Epb41l5                        | Rapgef6 |                          | Guf1                    | Rrm1    |                             |
| Fbxo43                         | Rexo2   |                          | Gulp1                   | S100a11 |                             |
| Fdft1                          | Rfesd   |                          | Havcr1                  | Sdhd    |                             |
| Ftl                            | Rhot1   |                          | Hddc2                   | Serbp1  |                             |
| Ggct                           | Rnf10   |                          | Hpgd                    | Shfm1   |                             |
| Gnpda2                         | Rpia    |                          | Ibtk                    | Skiv2l2 |                             |
| Gopc                           | Sdccag8 |                          | Ipo5                    | Slc35b3 |                             |
| Grb7                           | She     |                          | Klf3                    | Slco4c1 |                             |
| Grm8                           | Shmt2   |                          | <i>Klf4<sup>b</sup></i> | Ssbp1   |                             |

Note: to the initial lists of genes obtained from Xue et al. 2013, we added maternal genes from **(a)** Kocabas et al., *Proc. Natl. Acad. Sci. U. S. A.* **103**, 14027–14032 (2006), and genes expressed in stem cells from **(b)** Takahashi et al., *Cell* **131**, 861–872 (2007) and **(c)** Yu et al., *Science* **318**, 1917–1920 (2007).
